# Supplementary material for: Diurnal variations in the expression of core-clock genes correlate with resting muscle properties and predict fluctuations in exercise performance across the day
Source: HighWire-hosted journal article supplement (doi:10.1136/bmjsem-2020-000876), 2021-02-01
Supplement: bmjsem-2020-000876supp001_data_supplement.pdf [file bmjsem-2020-000876supp001_data_supplement.pdf]

Diurnal variations in the expression of core-clock genes correlate with resting muscle properties and predict fluctuations in exercise performance across the day  
Basti et al.

## SUPPLEMENTARY MATERIAL

### Supplementary Figures

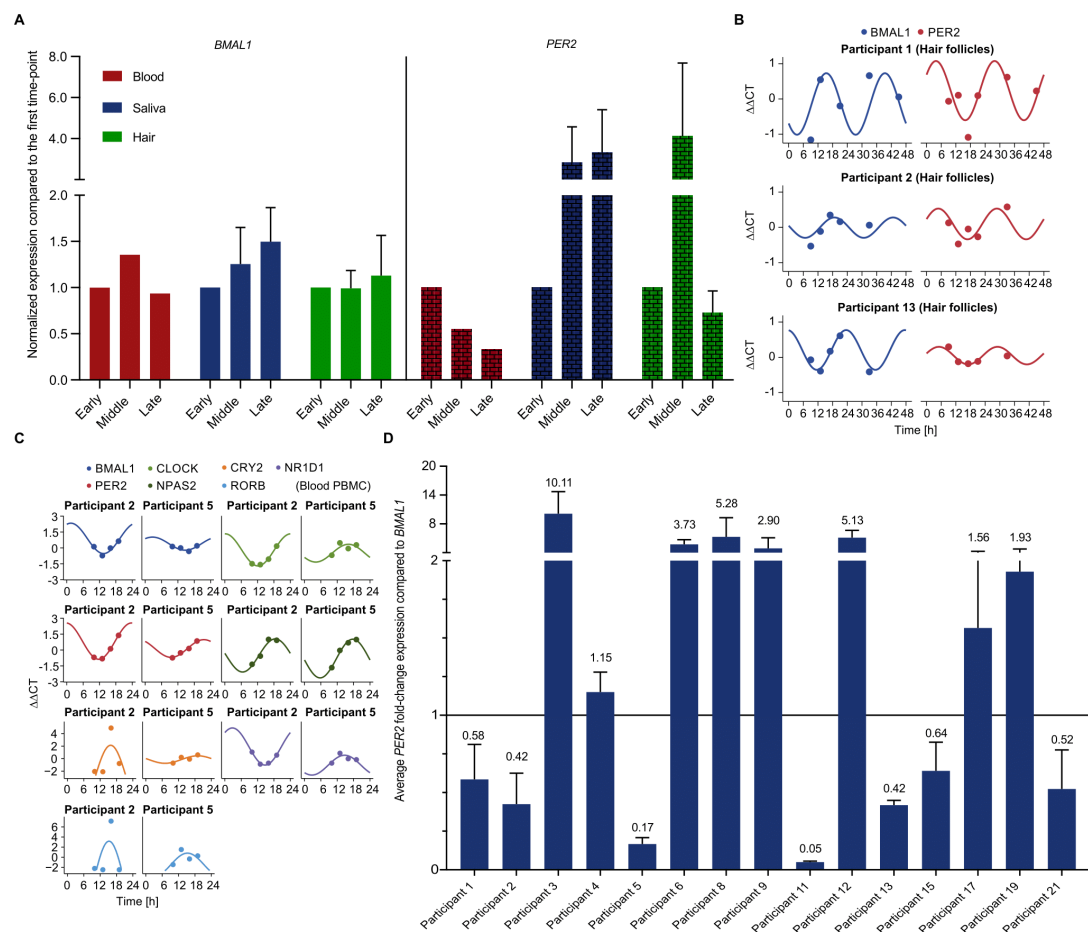

**Supplementary figure 1.** *BMAL1* and *PER2* expression display variation during the day in human blood, hair and saliva samples. **(A)** Three time-point comparison of *BMAL1* and *PER2* expression for the averaged data of all participants in **figure 1**. Expression data is compared to the first time-point (Early). For hair and saliva data Early, Middle and Late time-points represent 9h, 17h and 21h, respectively. For PBMCs data Early, Middle and Late time-points represent 10h, 16h and 19h, respectively. Depicted are mean + SEM. **(B)** Time-course RT-qPCR measurements normalised to the mean of all time points ( $\Delta\Delta CT$ ) of *BMAL1* (blue) and *PER2* (red) of Participant 1, 2, and 13 with a fitted linear sine-cosine function (period = 24h). For Participant 1, we collected one additional sample at 21h on the 2nd day. Harmonic regression best *p*-values for tested periods (20-28h): Participant 1; *BMAL1* (0.517, period = 21.4h), *PER2* (0.353, period = 24h). Participant 2; *BMAL1* (0.038, period = 20h), *PER2* (0.276, period = 28h). Participant 13; *BMAL1* (0.014, period = 20h), *PER2* (0.086, period = 21.4h). **(C)** Time-course RT-qPCR measurements of human PBMCs normalised to the mean of all time points ( $\Delta\Delta CT$ ) of *BMAL1* (blue), *CLOCK* (green), *NPAS2* (dark green), *PER2* (red), *CRY2*

Diurnal variations in the expression of core-clock genes correlate with resting muscle properties and predict fluctuations in exercise performance across the day  
Basti et al.

(orange), *NR1D1* (purple), and *RORB* (light blue) of Participant 2 and 5 with a fitted linear sine-cosine function (period = 24 h). Harmonic regression best  $p$ -values: Participant 2; *BMAL1* ( $3.05E-01$ , period = 20h), *CLOCK* ( $6.31E-02$ , period = 28h), *NPAS2* ( $1.67E-01$ , period = 20h), *PER2* ( $4.78E-04$ , period = 20.8h), *CRY2* ( $7.17E-01$ , period = 20h), *NR1D1* ( $1.48E-01$ , period = 28h) and *RORB* ( $7.58E-01$ , period = 20h). Participant 5; *BMAL1* ( $5.56E-01$ , period = 20h), *CLOCK* ( $6.81E-01$ , period = 28h), *NPAS2* ( $9.75E-02$ , period = 28h), *PER2* ( $1.23E-01$ , period = 28h), *CRY2* ( $5.40E-01$ , period = 28h), *NR1D1* ( $6.43E-01$ , period = 28h) and *RORB* ( $7.73E-01$ , period = 28h). (D) Average *PER2* expression compared to *BMAL1* using saliva time-course data for each participant (mean + SEM).

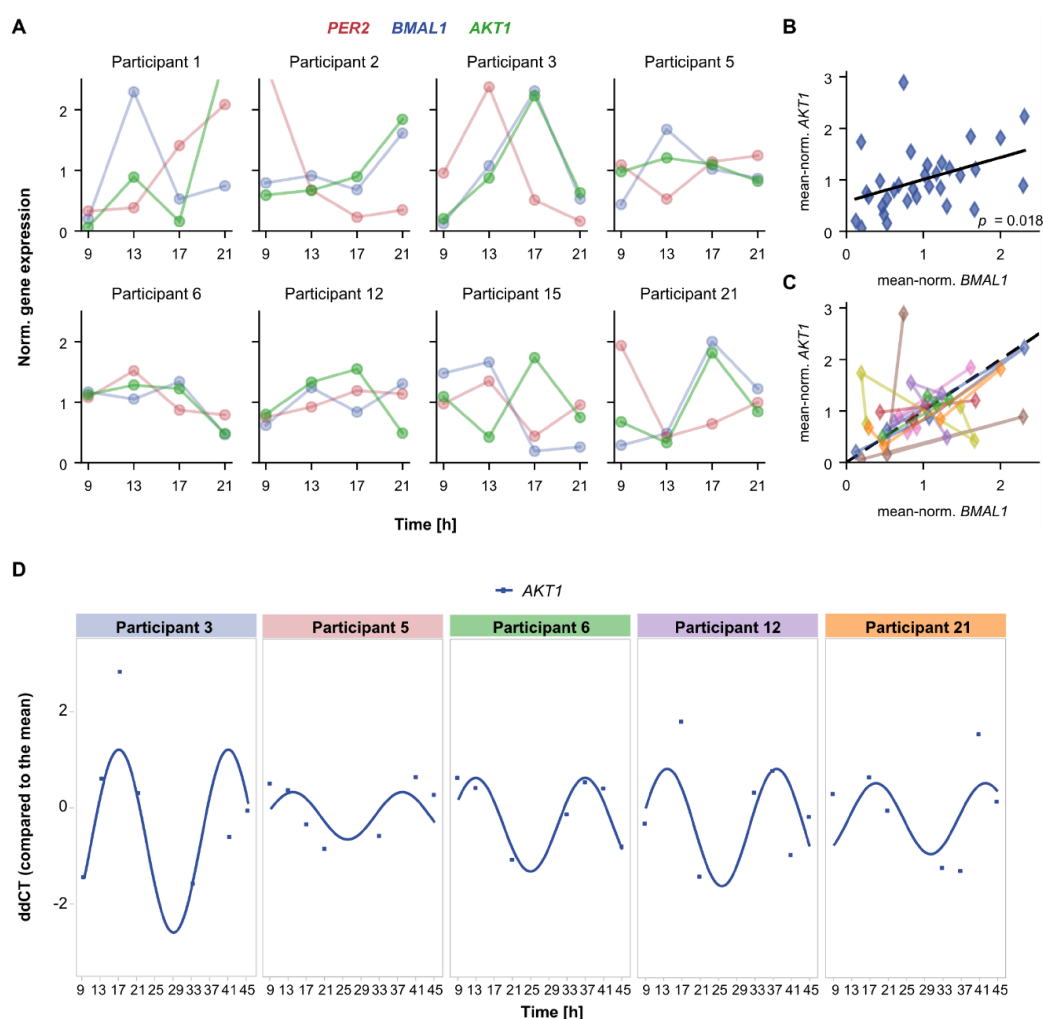

**Supplementary figure 2.** Gene expression of *BMAL1* and *AKT1* covary. (A) Mean-normalized gene expression profile for the three participants for whom the gene *AKT1* was measured besides *BMAL1* and *PER2*. The two days were treated as repetitions. The diurnal variation of *AKT1* follows *BMAL1*. (B) The data points from the mean-normalized time-series of *BMAL1* and *AKT1* correlate, linear regression with  $p = 0.018$ . (C) The same data points as in (B), but with a line connecting the different time points for each individual participant

Diurnal variations in the expression of core-clock genes correlate with resting muscle properties and predict fluctuations in exercise performance across the day *Basti et al.*

(color-coded) shows that a large proportion of the lines align with the dashed diagonal, suggesting a one-to-one relation of the mean normalized *BMAL1* and *AKT1*. Pearson's correlation coefficient calculated on the mean-normalized expression levels of *BMAL1* and *AKT1* when concatenating all participants evaluates to 0.41. **(D)** Harmonic regression plots for the participants with at least 5 time points. Depicted values are based on individual best fitting period (20h – 28h, **Supplementary table 10**).

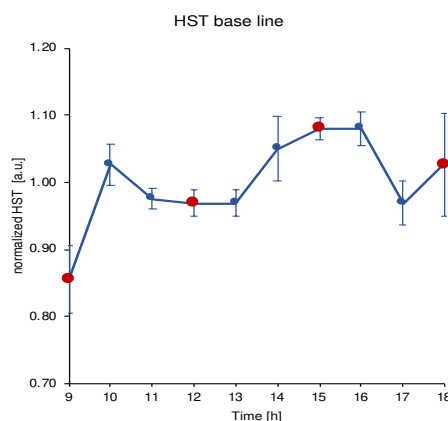

**Supplementary figure 3.** HST base line measurements. Depicted are mean values for three participants (9h-18h in one-hour intervals, N = 3, mean  $\pm$  SEM). The HST measurements were randomly distributed across three measurement days with one day break in between. The red full circles represent the time point chosen for the subsequent exercise sessions.

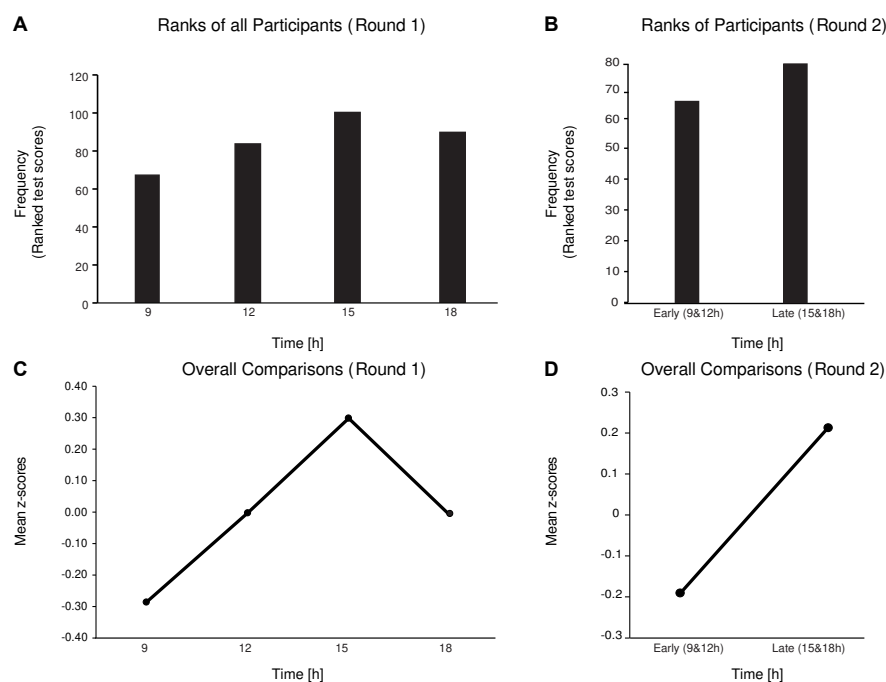

**Supplementary figure 4.** Cumulative ranking scores for all participants and exercise **(A)** for participants (N=11) who took part in first round of athletic performance tests and completed

Diurnal variations in the expression of core-clock genes correlate with resting muscle properties and predict fluctuations in exercise performance across the day *Basti et al.*

all exercise sessions (Total scores per exercise session: 9h - 69, 12h - 83, 15h - 97, 18h - 84) **(B)** for participants (N=8 in total, 4 of the participants completed all exercise sessions) in second round of athletic performance tests (Total scores per exercise session: early (9h & 12h) - 66, late (15h & 18h) - 78 **(C)** Mean of z-scores for participants (N=11) who took part in first round of athletic performance tests, **(D)** Mean of z-scores for participants (N=8) who took part in second round of athletic performance tests.

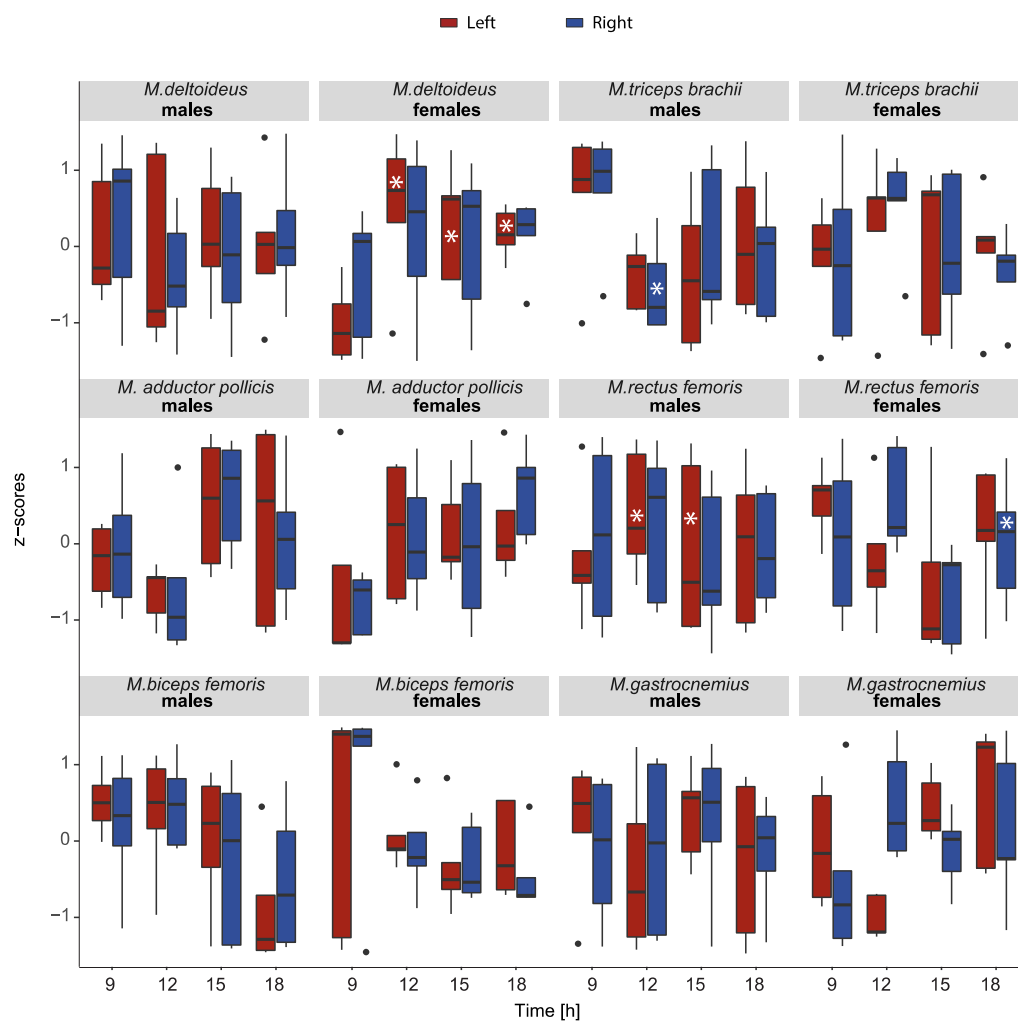

**Supplementary figure 5.** Myotometric analysis shows daily variation in muscle tone (frequency, F) for female and male participants. Only participants who completed all exercise sessions were included in the MyotonPRO measurements (N=12). Mean of normalized scores for the myotometric parameter frequency [Hz] for each exercise session (T1-9h, T2-12h, T3-15h, T4-18h) and each muscle: *M. Deltoideus*, *M. Triceps Brachii*, *M.adductor pollicis*, *M. rectus femoris*, *M. biceps femoris*, *M. gastrocnemius*. The measurements were carried out from top to bottom on the right (R - blue line) and the corresponding left (L - red line) side of the body. Corresponding statistics for intrapersonal variation between each time points can be found in **Supplementary Table 9**. \*  $p < 0.05$ , compared to time point 9h.

Diurnal variations in the expression of core-clock genes correlate with resting muscle properties and predict fluctuations in exercise performance across the day *Basti et al.*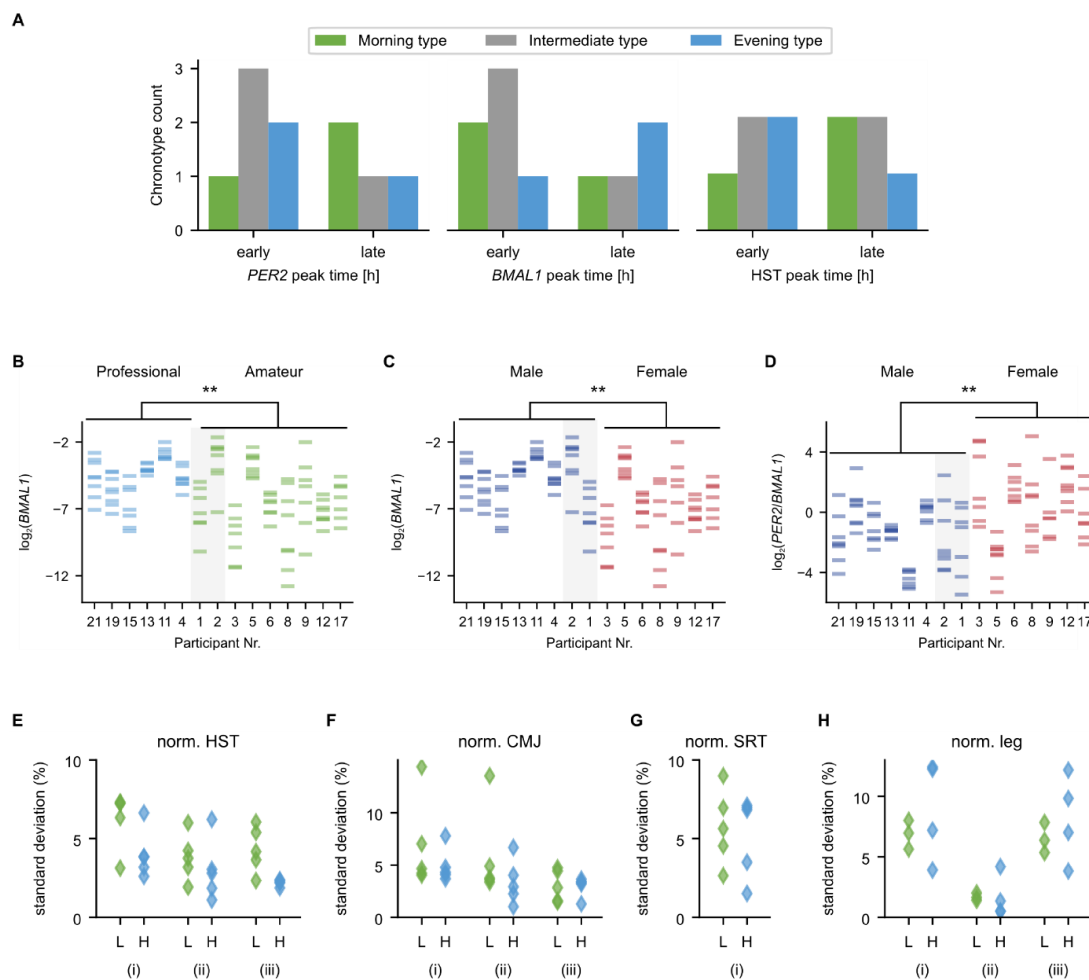

**Supplementary figure 6.** (A) For the group of ten participants with exercise data and genetic data, the chronotype distributions based on the Morningness/Eveningness Questionnaire are comparable for the subgroups with early versus late peak time for *PER2*, *BMAL1* and *HST*, respectively. (B) For each participant with genetic data, the expression values of *BMAL1* are plotted for all timepoints. Participants with a professional background (light blue) have a significantly higher *BMAL1* expression compared to participants without a professional background (amateurs, green) (Welch's t-test,  $p < 0.0001$ ). The grey background marks male amateurs. (C) Significantly higher *BMAL1* expression is also observed when comparing males (dark blue) with females (red) (Welch's t-test,  $p < 0.0001$ ). For this comparison, the male amateurs marked with a grey background switch groups compared to (B). (D) The separation between male and female expression values becomes visually more prominent when considering the ratio of *PER2* and *BMAL1* (Welch's t-test,  $p < 0.0001$ ). (E-H) Standard deviations of normalized exercise and muscle tone data (L: group with low *BMAL1*, H: group with high *BMAL1*). Mean standard deviation calculated on the normalized exercise performance and the normalized muscle tone data for different (i) repetitions and timepoints, (ii) timepoints, (iii) repetitions (for details see Methods). (E) HST, (F) CMJ, (G) SRT (no repetitions were measured, thus the standard deviation (i) over all data is the same as (ii) over timepoints), (H) muscle tone of the leg muscles (*M. rectus femoris*, *M. biceps femoris*, *M. gastrocnemius*).

Diurnal variations in the expression of core-clock genes correlate with resting muscle properties and predict fluctuations in exercise performance across the day *Basti et al.*

---

Diurnal variations in the expression of core-clock genes correlate with resting muscle properties and predict fluctuations in exercise performance across the day *Basti et al.*

### Supplementary tables

| Mesor | qvals | pvals | Acrophase [h] | Acrophase [radians] | Amplitude | Period [h] | Condition            |
|-------|-------|-------|---------------|---------------------|-----------|------------|----------------------|
| -0.50 | 0.49  | 0.18  | 15.83         | 4.14                | 1.22      | 23.6       | BMAL1_Participant 5  |
| 0.42  | 0.60  | 0.42  | 25.32         | 6.62                | 0.92      | 26.2       | PER2_Participant 5   |
| -0.12 | 0.24  | 0.01  | 6.67          | 1.74                | 1.80      | 28         | BMAL1_Participant 15 |
| -0.03 | 0.70  | 0.54  | 6.60          | 1.72                | 0.58      | 28         | PER2_Participant 15  |
| -0.03 | 0.31  | 0.05  | 0.59          | 0.15                | 1.49      | 20.9       | BMAL1_Participant 21 |
| 0.29  | 0.35  | 0.06  | 6.30          | 1.70                | 1.48      | 20         | PER2_Participant 21  |
| -2.03 | 0.52  | 0.23  | 15.08         | 3.94                | 4.38      | 25.2       | BMAL1_Participant 8  |
| -0.63 | 0.70  | 0.58  | 12.54         | 3.28                | 1.26      | 28         | PER2_Participant 8   |
| -0.71 | 0.21  | 0.01  | 18.33         | 4.79                | 3.85      | 22.9       | BMAL1_Participant 9  |
| -0.06 | 0.51  | 0.15  | 3.29          | 0.86                | 2.33      | 20         | PER2_Participant 9   |
| 0.02  | 0.15  | 0.01  | 20.33         | 5.32                | 1.78      | 20.8       | BMAL1_Participant 17 |
| 0.38  | 0.70  | 0.40  | 0.51          | 0.13                | 0.72      | 28         | PER2_Participant 17  |
| -0.01 | 0.48  | 0.14  | 21.05         | 5.51                | 0.28      | 22.1       | BMAL1_Participant 13 |
| 0.05  | 0.56  | 0.15  | 24.33         | 6.36                | 0.11      | 28         | PER2_Participant 13  |
| -0.16 | 0.70  | 0.54  | 17.04         | 4.46                | 0.42      | 28         | PER2_Participant 11  |
| -0.16 | 0.73  | 0.63  | 15.67         | 4.10                | 0.34      | 28         | BMAL1_Participant 11 |
| -1.47 | 0.45  | 0.06  | 14.34         | 3.75                | 3.50      | 26.6       | BMAL1_Participant 1  |
| 0.29  | 0.31  | 0.02  | 21.82         | 5.71                | 1.71      | 26.9       | PER2_Participant 1   |
| -0.85 | 0.21  | 0.02  | 16.80         | 4.39                | 2.65      | 23.5       | BMAL1_Participant 3  |
| -0.61 | 0.21  | 0.01  | 13.75         | 3.59                | 1.63      | 22.6       | PER2_Participant 3   |
| -0.12 | 0.10  | 0.03  | 13.36         | 3.49                | 1.43      | 20         | BMAL1_Participant 19 |
| 0.38  | 0.56  | 0.07  | 27.44         | 7.18                | 0.76      | 28         | PER2_Participant 19  |
| 0.17  | 0.88  | 0.58  | 4.98          | 1.30                | 1.07      | 20         | BMAL1_Participant 2  |
| 0.02  | 0.69  | 0.29  | 11.28         | 2.95                | 0.50      | 20.3       | PER2_Participant 2   |
| 0.00  | 0.60  | 0.31  | 21.15         | 5.53                | 0.56      | 23.4       | BMAL1_Participant 4  |
| -0.04 | 0.63  | 0.23  | 20.07         | 5.25                | 0.28      | 20.7       | PER2_Participant 4   |
| -0.01 | 0.67  | 0.28  | 1.88          | 0.49                | 0.71      | 20         | BMAL1_Participant 12 |
| -0.13 | 0.84  | 0.53  | 18.94         | 4.95                | 0.76      | 20         | PER2_Participant 12  |
| -0.60 | 0.46  | 0.09  | 12.22         | 3.19                | 1.46      | 26.7       | BMAL1_Participant 6  |
| -0.05 | 0.40  | 0.09  | 12.83         | 3.35                | 0.42      | 22         | PER2_Participant 6   |

Supplementary Table 1 - Harmonic regression analysis (Figure 2)

Diurnal variations in the expression of core-clock genes correlate with resting muscle properties and predict fluctuations in exercise performance across the day *Basti et al.*

| Participant # | gender | MEQ              | exercise tests      |                  |          | molecular tests |      |       | myotonometry |
|---------------|--------|------------------|---------------------|------------------|----------|-----------------|------|-------|--------------|
|               |        |                  | # exercise sessions | # round of tests | HST_long | saliva          | hair | blood | MyotonPRO    |
| 1             | male   | intermediate     | -                   | -                | -        | Y               | Y    | -     | -            |
| 2             | male   | intermediate     | -                   | -                | -        | Y               | Y    | Y     | -            |
| 3             | female | intermediate     | -                   | -                | Y        | Y               | -    | -     | -            |
| 4             | male   | moderate morning | -                   | -                | Y        | Y               | Y    | -     | -            |
| 5             | female | moderate morning | 4                   | 1                | Y        | Y               | -    | Y     | Y            |
| 6             | female | moderate evening | 4                   | 1                | -        | Y               | -    | -     | Y            |
| 7             | female | intermediate     | 4                   | 1                | -        | -               | -    | -     | Y            |
| 8             | female | intermediate     | 4                   | 1                | -        | Y               | -    | -     | Y            |
| 9             | female | moderate evening | 4                   | 1                | -        | Y               | -    | -     | Y            |
| 10            | male   | intermediate     | 4                   | 1                | -        | -               | -    | -     | Y            |
| 11            | male   | intermediate     | 4                   | 1                | -        | Y               | -    | -     | Y            |
| 12            | female | intermediate     | -                   | -                | -        | Y               | -    | -     | -            |
| 13            | male   | intermediate     | 4                   | 1                | -        | Y               | Y    | -     | Y            |
| 14            | male   | intermediate     | 4                   | 1                | -        | -               | -    | -     | Y            |
| 15            | male   | intermediate     | 4                   | 1                | -        | Y               | -    | -     | Y            |
| 16            | male   | moderate evening | 4                   | 1                | -        | -               | -    | -     | Y            |
| 5             | female | moderate morning | 3                   | 2                | -        | -               | -    | -     | -            |
| 8             | female | intermediate     | 3                   | 2                | -        | -               | -    | -     | -            |
| 17            | female | moderate evening | 4                   | 2                | -        | Y               | -    | -     | -            |
| 18            | male   | intermediate     | 3                   | 2                | -        | -               | -    | -     | -            |
| 10            | male   | intermediate     | 4                   | 2                | -        | -               | -    | -     | -            |
| 19            | male   | moderate morning | 3                   | 2                | -        | Y               | -    | -     | -            |
| 20            | male   | moderate evening | 4                   | 2                | -        | -               | -    | -     | -            |
| 21            | male   | moderate morning | 4                   | 2                | -        | Y               | -    | -     | -            |

**Supplementary Table 2** - List of participants and tests (MEQ, Exercise tests, Molecular tests, Myotonometry) performed. Y = Yes, participant has carried out the test.

| Time [h] | 9    | 10   | 11   | 12   | 13   | 14   | 15   | 16   | 17   | 18   |
|----------|------|------|------|------|------|------|------|------|------|------|
| mean     | 0.86 | 1.03 | 0.98 | 0.97 | 0.97 | 1.05 | 1.08 | 1.08 | 0.97 | 1.03 |
| SEM      | 0.05 | 0.03 | 0.02 | 0.02 | 0.02 | 0.05 | 0.02 | 0.03 | 0.03 | 0.08 |

**Supplementary Table 3** - HST base line measurements (9h-18h in one-hour intervals, N = 3, mean  $\pm$  SEM).



Diurnal variations in the expression of core-clock genes correlate with resting muscle properties and predict fluctuations in exercise performance across the day *Basti et al.*

| Exercise                        | Repetitions                                                                 | Aim and muscle group used                                                                                                         |
|---------------------------------|-----------------------------------------------------------------------------|-----------------------------------------------------------------------------------------------------------------------------------|
| Jogging – Forward and backwards | 2 × 20 m Forwards<br>2 × 20 m Backwards                                     | whole body warm up                                                                                                                |
| “Butt kicks”                    | 2 × 20 m                                                                    | ischio-crucal muscles                                                                                                             |
| High knees                      | 2 × 20 m                                                                    | lower limbs                                                                                                                       |
| Sidesteps                       | 1 × 20 m                                                                    | abductors                                                                                                                         |
| Cross-step exercise             | 1 × 20 m                                                                    | foot coordination                                                                                                                 |
| Knee to chest                   | 10 ×                                                                        | stretching of the hamstrings ( <i>M. biceps femoris</i> )                                                                         |
| Foot inside pull                | 10 ×                                                                        | stretching of the leg adductors                                                                                                   |
| Lunge                           | 10 ×                                                                        | stretching of <i>M. psoas major</i> , activating the leg muscles and stability work                                               |
| Caterpillar                     | 5 ×                                                                         | stretching the hamstrings ( <i>M. biceps femoris</i> ), core muscles activation and activation for the muscles of the upper limbs |
| Jogging – Forward and backwards | 1 × 20 m Forwards<br>1 × 20 m Backwards                                     | whole body warm up before sprinting                                                                                               |
| Intensity Sprints               | 30 % max speed<br>60 % max speed<br>90 % max speed<br>20 m sprint max speed | step by step preparation for explosive workout                                                                                    |

Supplementary Table 4 - 15 min warm-up sequence.

Supplementary Table 5 - Exercises: HST, CMJ, SRT. (provided as excel file). For overall and gender wise comparisons.

| Test | Time point | T1        | T2    | T3    | T4 |
|------|------------|-----------|-------|-------|----|
| HST  | T1         | NA        |       |       |    |
| HST  | T2         | 0.642     | NA    |       |    |
| HST  | T3         | 0.642     | 0.894 | NA    |    |
| HST  | T4         | 0.894     | 0.642 | 0.642 | NA |
| CMJ  | T1         | NA        |       |       |    |
| CMJ  | T2         | 0.496     | NA    |       |    |
| CMJ  | T3         | 0.034     | 0.005 | NA    |    |
| CMJ  | T4         | 0.416     | 0.784 | 0.005 | NA |
| SRT  | T1         | NA        |       |       |    |
| SRT  | T2         | 0.0003    | NA    |       |    |
| SRT  | T3         | 0.0008    | 0.659 | NA    |    |
| SRT  | T4         | 2.739e-07 | 0.027 | 0.011 | NA |

| Test | Gender | Time point | T1    | T2    | T3    | T4 |
|------|--------|------------|-------|-------|-------|----|
| HST  | Male   | T1         | NA    |       |       |    |
| HST  | Male   | T2         | 0.879 | NA    |       |    |
| HST  | Male   | T3         | 0.879 | 1     | NA    |    |
| HST  | Male   | T4         | 0.879 | 1     | 1     | NA |
| HST  | Female | T1         | NA    |       |       |    |
| HST  | Female | T2         | 0.373 | NA    |       |    |
| HST  | Female | T3         | 0.373 | 0.789 | NA    |    |
| HST  | Female | T4         | 0.514 | 0.514 | 0.514 | NA |
| CMJ  | Male   | T1         | NA    |       |       |    |
| CMJ  | Male   | T2         | 0.681 | NA    |       |    |
| CMJ  | Male   | T3         | 0.015 | 0.005 | NA    |    |
| CMJ  | Male   | T4         | 0.681 | 1     | 0.005 | NA |
| CMJ  | Female | T1         | NA    |       |       |    |
| CMJ  | Female | T2         | 0.805 | NA    |       |    |
| CMJ  | Female | T3         | 0.805 | 1     | NA    |    |

Diurnal variations in the expression of core-clock genes correlate with resting muscle properties and predict fluctuations in exercise performance across the day *Basti et al.*

|     |        |    |        |       |       |    |
|-----|--------|----|--------|-------|-------|----|
| CMJ | Female | T4 | 0.622  | 0.805 | 0.805 | NA |
| SRT | Male   | T1 | NA     |       |       |    |
| SRT | Male   | T2 | 0.017  | NA    |       |    |
| SRT | Male   | T3 | 0.034  | 0.550 | NA    |    |
| SRT | Male   | T4 | 0.0003 | 0.098 | 0.034 | NA |
| SRT | Female | T1 | NA     |       |       |    |
| SRT | Female | T2 | 0.481  | NA    |       |    |
| SRT | Female | T3 | 0.481  | 0.893 | NA    |    |
| SRT | Female | T4 | 0.481  | 0.827 | 0.827 | NA |

**Supplementary Table 6** - Statistics corresponding to Figure 4. Friedmann test was used for determining the pairwise intrapersonal variations between different exercise times.

**Supplementary Table 7** - Biomechanical parameters from data collected for the five measured MPs (MP1 - *M.adductor pollicis*, MP2 - *M. rectus femoris*, MP3 - *M. biceps femoris*, MP4 - *M. gastrocnemius*) (provided as excel file)

| Muscle_Name         |    | T1    | T2    | T3    | T4 |
|---------------------|----|-------|-------|-------|----|
| m_deltoideus_L      | T1 | NA    |       |       |    |
| m_deltoideus_L      | T2 | 0.131 | NA    |       |    |
| m_deltoideus_L      | T3 | 0.060 | 0.629 | NA    |    |
| m_deltoideus_L      | T4 | 0.060 | 0.707 | 0.786 | NA |
| m_deltoideus_R      | T1 | NA    |       |       |    |
| m_deltoideus_R      | T2 | 0.655 | NA    |       |    |
| m_deltoideus_R      | T3 | 1     | 0.655 | NA    |    |
| m_deltoideus_R      | T4 | 0.655 | 1     | 0.655 | NA |
| m_triceps_brachii_L | T1 |       |       |       |    |
| m_triceps_brachii_L | T2 | 0.718 | NA    |       |    |
| m_triceps_brachii_L | T3 | 0.718 | 0.766 | NA    |    |
| m_triceps_brachii_L | T4 | 0.718 | 0.792 | 0.792 | NA |
| m_triceps_brachii_R | T1 | NA    |       |       |    |
| m_triceps_brachii_R | T2 | 0.585 | NA    |       |    |
| m_triceps_brachii_R | T3 | 0.649 | 0.649 | NA    |    |
| m_triceps_brachii_R | T4 | 0.585 | 0.792 | 0.720 | NA |
| m_add_pollicis_L    | T1 | NA    |       |       |    |
| m_add_pollicis_L    | T2 | 0.674 | NA    |       |    |
| m_add_pollicis_L    | T3 | 0.008 | 0.012 | NA    |    |
| m_add_pollicis_L    | T4 | 0.062 | 0.113 | 0.255 | NA |
| m_add_pollicis_R    | T1 | NA    |       |       |    |
| m_add_pollicis_R    | T2 | 1     | NA    |       |    |
| m_add_pollicis_R    | T3 | 0.051 | 0.051 | NA    |    |
| m_add_pollicis_R    | T4 | 0.028 | 0.028 | 0.699 | NA |
| m_rectus_femoris_L  | T1 | NA    |       |       |    |
| m_rectus_femoris_L  | T2 | 1     | NA    |       |    |

Diurnal variations in the expression of core-clock genes correlate with resting muscle properties and predict fluctuations in exercise performance across the day *Basti et al.*

|                    |    |       |        |       |    |
|--------------------|----|-------|--------|-------|----|
| m_rectus_femoris_L | T3 | 0.241 | 0.241  | NA    |    |
| m_rectus_femoris_L | T4 | 1     | 1      | 0.241 | NA |
| m_rectus_femoris_R | T1 | NA    |        |       |    |
| m_rectus_femoris_R | T2 | 0.127 | NA     |       |    |
| m_rectus_femoris_R | T3 | 0.214 | 0.014  | NA    |    |
| m_rectus_femoris_R | T4 | 1     | 0.127  | 0.214 | NA |
| m_biceps_femoris_L | T1 | NA    |        |       |    |
| m_biceps_femoris_L | T2 | 0.777 | NA     |       |    |
| m_biceps_femoris_L | T3 | 0.250 | 0.190  | NA    |    |
| m_biceps_femoris_L | T4 | 0.003 | 0.003  | 0.059 | NA |
| m_biceps_femoris_R | T1 | NA    |        |       |    |
| m_biceps_femoris_R | T2 | 0.780 | NA     |       |    |
| m_biceps_femoris_R | T3 | 0.017 | 0.025  | NA    |    |
| m_biceps_femoris_R | T4 | 0.017 | 0.017  | 0.780 | NA |
| m_gastr_cm_L       | T1 | NA    |        |       |    |
| m_gastr_cm_L       | T2 | 0.005 | NA     |       |    |
| m_gastr_cm_L       | T3 | 0.474 | 0.0009 | NA    |    |
| m_gastr_cm_L       | T4 | 0.775 | 0.007  | 0.388 | NA |
| m_gastr_cm_R       | T1 | NA    |        |       |    |
| m_gastr_cm_R       | T2 | 0.436 | NA     |       |    |
| m_gastr_cm_R       | T3 | 0.518 | 0.518  | NA    |    |
| m_gastr_cm_R       | T4 | 0.518 | 0.518  | 0.792 | NA |

Supplementary Table 8 - Statistical analysis with Friedmann test corresponding to Figure 5.

|                                          |           |           |           |           |
|------------------------------------------|-----------|-----------|-----------|-----------|
| <b>M. Deltoideus_Left (Females)</b>      | <b>T1</b> | <b>T2</b> | <b>T3</b> | <b>T4</b> |
| T1                                       | NA        |           |           |           |
| T2                                       | 0.038     | NA        |           |           |
| T3                                       | 0.038     | 1         | NA        |           |
| T4                                       | 0.047     | 0.902     | 0.902     | NA        |
| <b>M. Deltoideus_Right (Females)</b>     | <b>T1</b> | <b>T2</b> | <b>T3</b> | <b>T4</b> |
| T1                                       | NA        |           |           |           |
| T2                                       | 0.629     | NA        |           |           |
| T3                                       | 0.629     | 0.797     | NA        |           |
| T4                                       | 0.797     | 0.670     | 0.629     | NA        |
| <b>M. Triceps Brachii_Left (Females)</b> | <b>T1</b> | <b>T2</b> | <b>T3</b> | <b>T4</b> |
| T1                                       | NA        |           |           |           |
| T2                                       | 0.807     | NA        |           |           |
| T3                                       | 0.807     | 0.807     | NA        |           |
| T4                                       | 0.807     | 0.807     | 0.807     | NA        |
| <b>M. Triceps Brachii_Right(Females)</b> | <b>T1</b> | <b>T2</b> | <b>T3</b> | <b>T4</b> |
| T1                                       | NA        |           |           |           |
| T2                                       | 0.741     | NA        |           |           |
| T3                                       | 0.741     | 0.741     | NA        |           |
| T4                                       | 1         | 0.741     | 0.741     | NA        |
| <b>M. Rectus Femoris_Left(Females)</b>   | <b>T1</b> | <b>T2</b> | <b>T3</b> | <b>T4</b> |
| T1                                       | NA        |           |           |           |
| T2                                       | 0.922     | NA        |           |           |
| T3                                       | 0.922     | 0.964     | NA        |           |
| T4                                       | 0.922     | 1         | 0.964     | NA        |
| <b>M. Rectus Femoris_Right(Females)</b>  | <b>T1</b> | <b>T2</b> | <b>T3</b> | <b>T4</b> |
| T1                                       | NA        |           |           |           |
| T2                                       | 0.210     | NA        |           |           |
| T3                                       | 0.434     | 0.539     | NA        |           |
| T4                                       | 0.049     | 0.210     | 0.142     | NA        |
| <b>M. Biceps Femoris_Left(Females)</b>   | <b>T1</b> | <b>T2</b> | <b>T3</b> | <b>T4</b> |

Diurnal variations in the expression of core-clock genes correlate with resting muscle properties and predict fluctuations in exercise performance across the day *Basti et al.*

|                                            |           |           |           |           |
|--------------------------------------------|-----------|-----------|-----------|-----------|
| T1                                         | NA        |           |           |           |
| T2                                         | 0.441     | NA        |           |           |
| T3                                         | 0.377     | 0.712     | NA        |           |
| T4                                         | 1         | 0.441     | 0.377     | NA        |
| <b>M. Biceps Femoris_Right(Females)</b>    | <b>T1</b> | <b>T2</b> | <b>T3</b> | <b>T4</b> |
| T1                                         | NA        |           |           |           |
| T2                                         | 0.516     | NA        |           |           |
| T3                                         | 0.516     | 0.488     | NA        |           |
| T4                                         | 0.790     | 0.516     | 0.516     | NA        |
| <b>M. Adductor Pollicis_Left(Females)</b>  | <b>T1</b> | <b>T2</b> | <b>T3</b> | <b>T4</b> |
| T1                                         | NA        |           |           |           |
| T2                                         | 0.797     | NA        |           |           |
| T3                                         | 0.670     | 0.629     | NA        |           |
| T4                                         | 0.629     | 0.629     | 0.797     | NA        |
| <b>M. Adductor Pollicis_Right(Females)</b> | <b>T1</b> | <b>T2</b> | <b>T3</b> | <b>T4</b> |
| T1                                         | NA        |           |           |           |
| T2                                         | 0.473     | NA        |           |           |
| T3                                         | 0.185     | 0.333     | NA        |           |
| T4                                         | 0.185     | 0.392     | 0.773     | NA        |
| <b>M. Gastrocnemius_Left(Females)</b>      | <b>T1</b> | <b>T2</b> | <b>T3</b> | <b>T4</b> |
| T1                                         | NA        |           |           |           |
| T2                                         | 0.263     | NA        |           |           |
| T3                                         | 0.197     | 0.038     | NA        |           |
| T4                                         | 0.197     | 0.038     | 1         | NA        |
| <b>M. Gastrocnemius_Right(Females)</b>     | <b>T1</b> | <b>T2</b> | <b>T3</b> | <b>T4</b> |
| T1                                         | NA        |           |           |           |
| T2                                         | 0.382     | NA        |           |           |
| T3                                         | 0.589     | 0.382     | NA        |           |
| T4                                         | 0.382     | 0.589     | 0.589     | NA        |
| <b>M. Deltoideus_Left (Males)</b>          | <b>T1</b> | <b>T2</b> | <b>T3</b> | <b>T4</b> |
| T1                                         | NA        |           |           |           |
| T2                                         | 0.963     | NA        |           |           |
| T3                                         | 0.963     | 0.963     | NA        |           |
| T4                                         | 0.963     | 0.963     | 1         | NA        |
| <b>M. Deltoideus_Right (Males)</b>         | <b>T1</b> | <b>T2</b> | <b>T3</b> | <b>T4</b> |
| T1                                         | NA        |           |           |           |
| T2                                         | 0.481     | NA        |           |           |
| T3                                         | 0.600     | 0.719     | NA        |           |
| T4                                         | 0.601     | 0.650     | 0.792     | NA        |
| <b>M. Triceps Brachii_Left (Males)</b>     | <b>T1</b> | <b>T2</b> | <b>T3</b> | <b>T4</b> |
| T1                                         | NA        |           |           |           |
| T2                                         | 0.458     | NA        |           |           |
| T3                                         | 0.466     | 0.689     | NA        |           |
| T4                                         | 0.534     | 0.534     | 0.689     | NA        |
| <b>M. Triceps Brachii_Right (Males)</b>    | <b>T1</b> | <b>T2</b> | <b>T3</b> | <b>T4</b> |
| T1                                         | NA        |           |           |           |
| T2                                         | 0.037     | NA        |           |           |
| T3                                         | 0.203     | 0.203     | NA        |           |
| T4                                         | 0.203     | 0.203     | 1         | NA        |
| <b>M. Rectus Femoris_Left(Males)</b>       | <b>T1</b> | <b>T2</b> | <b>T3</b> | <b>T4</b> |
| T1                                         | NA        |           |           |           |
| T2                                         | 0.652     | NA        |           |           |
| T3                                         | 0.039     | 0.047     | NA        |           |
| T4                                         | 0.219     | 0.129     | 0.360     | NA        |
| <b>M. Rectus Femoris_Right(Males)</b>      | <b>T1</b> | <b>T2</b> | <b>T3</b> | <b>T4</b> |
| T1                                         | NA        |           |           |           |
| T2                                         | 0.203     | NA        |           |           |
| T3                                         | 0.203     | 0.067     | NA        |           |
| T4                                         | 1         | 0.203     | 0.203     | NA        |
| <b>M. Biceps Femoris_Left(Males)</b>       | <b>T1</b> | <b>T2</b> | <b>T3</b> | <b>T4</b> |
| T1                                         | NA        |           |           |           |
| T2                                         | 0.637     | NA        |           |           |
| T3                                         | 1         | 0.637     | NA        |           |
| T4                                         | 1         | 0.637     | 1         | NA        |
| <b>M. Biceps Femoris_Right(Males)</b>      | <b>T1</b> | <b>T2</b> | <b>T3</b> | <b>T4</b> |
| T1                                         | NA        |           |           |           |
| T2                                         | 0.798     | NA        |           |           |
| T3                                         | 0.798     | 0.798     | NA        |           |

Diurnal variations in the expression of core-clock genes correlate with resting muscle properties and predict fluctuations in exercise performance across the day *Basti et al.*

| T4                                       | 0.798     | 0.798     | 0.798     | NA        |
|------------------------------------------|-----------|-----------|-----------|-----------|
| <b>M. Adductor Pollicis_Left(Males)</b>  | <b>T1</b> | <b>T2</b> | <b>T3</b> | <b>T4</b> |
| T1                                       | NA        |           |           |           |
| T2                                       | 1         | NA        |           |           |
| T3                                       | 0.801     | 0.801     | NA        |           |
| T4                                       | 0.076     | 0.076     | 0.118     | NA        |
| <b>M. Adductor Pollicis_Right(Males)</b> | <b>T1</b> | <b>T2</b> | <b>T3</b> | <b>T4</b> |
| T1                                       | NA        |           |           |           |
| T2                                       | 0.605     | NA        |           |           |
| T3                                       | 0.605     | 0.605     | NA        |           |
| T4                                       | 0.605     | 0.605     | 0.605     | NA        |
| <b>M. Gastrocnemius_Left(Males)</b>      | <b>T1</b> | <b>T2</b> | <b>T3</b> | <b>T4</b> |
| T1                                       | NA        |           |           |           |
| T2                                       | 0.228     | NA        |           |           |
| T3                                       | 0.584     | 0.228     | NA        |           |
| T4                                       | 0.228     | 0.584     | 0.421     | NA        |
| <b>M. Gastrocnemius_Right(Males)</b>     | <b>T1</b> | <b>T2</b> | <b>T3</b> | <b>T4</b> |
| T1                                       | NA        |           |           |           |
| T2                                       | 1         | NA        |           |           |
| T3                                       | 0.740     | 0.740     | NA        |           |
| T4                                       | 0.740     | 0.740     | 0.740     | NA        |

**Supplementary Table 9** - Statistical analysis for **Supplementary Figure 4**, pairwise comparisons (Friedmann test).

| Participant    | qvals | pvals | Acrophase [h] | amplitude | Period [h] |
|----------------|-------|-------|---------------|-----------|------------|
| Participant 3  | 0.249 | 0.178 | 18            | 1.506     | 28         |
| Participant 5  | 0.061 | 0.017 | 12            | 1.042     | 28         |
| Participant 6  | 0.011 | 0.001 | 11            | 1.068     | 26.6       |
| Participant 12 | 0.696 | 0.229 | 14            | 1.067     | 20         |
| Participant 21 | 0.249 | 0.167 | 14            | 1.386     | 28         |

**Supplementary Table 10** - Harmonic regression results of AKT1 for the best fitting period corresponding to **Supplementary Figure 2**.
