# Supplementary material for: Diurnal variations in the expression of core-clock genes correlate with resting muscle properties and predict fluctuations in exercise performance across the day
Source: HighWire-hosted journal article supplement (doi:10.1136/bmjsem-2020-000876), 2021-02-01
Supplement: bmjsem-2020-000876supp002_data_supplement.xlsx [file bmjsem-2020-000876supp002_data_supplement.xlsx]

## Sheet: Tabelle1
Supplementary Table 5
Participant #	Test	units	T1_1	T1_2	T1_3	T1_mean	T1_SE	T2_1	T2_2	T2_3	T2_mean	T2_SE	T3_1	T3_2	T3_3	T3_mean	T3_SE	T4_1	T4_2	T4_3	T4_mean	T4_SE
10	HST	Kg	52.7	52.6	51.1	52.1333	0.517472	51.3	47.5	49	49.2667	1.10504	52.7	51.8	53	52.5	0.360555	53	52	52.5	52.5	0.288675
	CMJ	Newton	1633.67	1697.95	1592.98	1641.53	30.5562	1873.97	1816.1	1786.04	1825.37	25.8029	1762.78	1730.45	1695.89	1729.71	19.3131	1715.27	1774.04	1755.48	1748.26	17.3449
	SRT	min,sec	8.27	-	-	8.27		9.45	-	-	9.45		9.06	-	-	9.06		10	-	-	10
5	HST	Kg	26.1	27.4	29	27.5	0.83865	29.2	29.8	29.4	29.4667	0.176383	29.6	30.1	28.8	29.5	0.378594	29.1	29.5	27.8	28.8	0.51316
	CMJ	Newton	1068.68	1047.09	952.18	1022.65	35.782	1037.45	1082.68	997.87	1039.33	24.5006	1000.46	1032.85	1002.27	1011.86	10.508	1054.75	1024.62	967.63	1015.67	25.5447
	SRT	min,sec	6.08	-	-	6.08		6.34	-	-	6.34		7.12	-	-	7.12		7.12	-	-	7.12
7	HST	Kg	26.5	28.3	27.9	27.5667	0.54569	27.4	24.9	27.1	26.4667	0.788106	28	27.7	28.9	28.2	0.360555	28.5	27.9	26.5	27.6333	0.592546
	CMJ	Newton	956.9	1115.8	1013.18	1028.63	46.5161	1061.65	1081.27	1133.26	1092.06	21.3644	1007.2	955.61	1031.43	998.08	22.3573	1045.99	1032.32	1109.98	1062.76	23.9359
	SRT	min,sec	8.47	-	-	8.47		8.05	-	-	8.05		8.59	-	-	8.59		7.55	-	-	7.55
8	HST	Kg	26.5	24.5	22.4	24.4667	1.18369	25.6	26.8	27.4	26.6	0.52915	28.3	25.6	25.1	26.3333	0.99387	22.5	28.1	27	25.8667	1.71302
	CMJ	Newton	1056.32	1158.38	1197.23	1137.31	42.0193	1209.18	1269.21	1207.14	1228.51	20.3585	1290.7	1151.19	1077.65	1173.18	62.4773	1253.53	1367.68	1260.14	1293.78	36.9976
	SRT	min,sec	8.06	-	-	8.06		8.05	-	-	8.05		7.05	-	-	7.05		9.1	-	-	9.1
9	HST	Kg	30	29.4	30.8	30.0667	0.405518	30.6	33	32.2	31.9333	0.705534	33	32	32.5	32.5	0.288675	31.1	32.7	33.1	32.3	0.61101
	CMJ	Newton	1271.17	1223.11	1211.89	1235.39	18.1808	1185.88	1178.17	1133.72	1165.92	16.2548	1288.26	1229.85	1158.99	1225.7	37.3747	1198.26	1175.48	1299.04	1224.26	37.9639
	SRT	min,sec	6.14	-	-	6.14		7.23	-	-	7.23		7.01	-	-	7.01		7.35	-	-	7.35
11	HST	Kg	74.4	75.8	76.6	75.6	0.64291	71.3	70.7	68.1	70.0333	0.982061	81.7	76.3	79.4	79.1333	1.56454	69.5	68.2	65	67.5667	1.33708
	CMJ	Newton	2245.35	2659.71	2479.08	2461.38	119.942	2265.64	2176.48	2226.69	2222.94	25.8066	2593.85	2694.08	2752.44	2680.12	46.3098	2479.03	2324.99	2403.93	2402.65	44.4721
	SRT	min,sec	13.39	-	-	13.39		11.49	-	-	11.49		12.15	-	-	12.15		11.15	-	-	11.15
13	HST	Kg	53.9	55.4	58.9	56.0667	1.48137	56.9	54.6	58.5	56.6667	1.13186	56.9	58.2	57.5	57.5333	0.375648	57.6	57.6	57.5	57.5667	0.0333333
	CMJ	Newton	1788.85	1782.5	1642.73	1738.03	47.6836	1946.74	1907.1	1783.57	1879.14	49.1344	1671.81	1862.45	1840.77	1791.68	60.2592	1818.4	1719.11	1767.91	1768.47	28.6639
	SRT	min,sec	10.3	-	-	10.3		10.41	-	-	10.41		10.15	-	-	10.15		10.58	-	-	10.58
15	HST	Kg	47.5	46.1	46.9	46.8333	0.405518	39.3	48.2	42.8	43.4333	2.58865	46.4	47.6	41	45	2.02978	38.8	44.8	41.7	41.7667	1.73237
	CMJ	Newton	1731.68	1834.66	1746.12	1770.82	32.191	1875.32	1762.34	1757.87	1798.51	38.4267	1950.86	1947.52	1954.35	1950.91	1.97181	1820.46	1818.41	1831.96	1823.61	4.21673
	SRT	min,sec	9.33	-	-	9.33		8.59	-	-	8.59		9.49	-	-	9.49		10.07	-	-	10.07
6	HST	Kg	37.1	37.7	44.8	39.8667	2.47274	40.6	40.4	37.7	39.5667	0.935117	36.1	38.4	37.8	37.4333	0.688799	36.7	37	35.6	36.4333	0.425572
	CMJ	Newton	1495.19	1485.43	1427.43	1469.35	21.1485	1413.09	1459.13	1277.67	1383.3	54.46	1488.48	1500.85	1572.58	1520.64	26.216	1422.55	1474.36	1458.56	1451.82	15.3309
	SRT	min,sec	9.4	-	-	9.4		9.55	-	-	9.55		9.55	-	-	9.55		8.54	-	-	8.54
16	HST	Kg	46.8	50.2	48.5	48.5	0.981495	49.4	43.5	45.9	46.2667	1.71302	47.3	44.9	45	45.7333	0.783865	46.5	47.1	46	46.5333	0.31798
	CMJ	Newton	1938.54	1977.65	2107.33	2007.84	51.0101	2024.05	2200.22	2092.89	2105.72	51.2589	2167.65	2137.23	2170.43	2158.44	10.6337	1936.41	1946.48	1958.89	1947.26	6.50113
	SRT	min,sec	6.53	-	-	6.53		7.42	-	-	7.42		6.55	-	-	6.55		7.19	-	-	7.19
14	HST	Kg	49.3	47.2	41.6	46.0333	2.29807	50	44.8	46.4	47.0667	1.53768	55.3	44.5	50	49.9333	3.11787	45.1	47.3	42.4	44.9333	1.41696
	CMJ	Newton	1778.42	1792.49	1715.44	1762.12	23.6891	1741.74	1673.72	1770.04	1728.5	28.5824	1982	1858.69	1781.3	1874	58.4404	1721.65	1842.32	1735.35	1766.44	38.1456
	SRT	min,sec	11			11		12.55			12.55		12.04			12.04		11.24	-	-	11.24
10	HST	Kg	51.4	49.4	47.9	49.5667	1.01379	49	50	50.1	49.7	0.351188	48.8	45.7	49.1	47.8667	1.08679	50.3	50.2	49.6	50.0333	0.218581
	CMJ	Newton	1890.93	1893.58	1881.02	1888.51	3.82233	1575.01	1626.42	1681.6	1627.68	30.7763	1869.65	1830.15	1884.87	1861.56	16.3064	1596.99	1636.3	1594.09	1609.13	13.6124
	SRT	min,sec	9.04			9.04		9.56			9.56		10			10		10.46	-	-	10.46
20	HST	Kg	58	57.1	55.1	56.7333	0.856997	58.4	56.5	54.7	56.5333	1.06823	52.1	48.9	51.4	50.8	0.971253	52.8	55	54	53.9333	0.635959
	CMJ	Newton	2398.08	2429.45	2430.9	2419.48	10.7065	2112.37	2154.57	2153.36	2140.1	13.8694	2365.81	2419.33	2465.13	2416.76	28.7001	2276.27	2322.77	2538.92	2379.32	80.9211
	SRT	min,sec	6.15			6.15		8.29			8.29		8.51			8.51		8.59	-	-	8.59
21	HST	Kg	67.5	62.2	62.1	63.9333	1.78357	65.5	64.5	63.5	64.5	0.57735	63.1	60.7	60.4	61.4	0.8544	61.1	63.4	64.7	63.0667	1.05251
	CMJ	Newton	2472.22	2550.76	2568.03	2530.34	29.4829	2460.35	2464.03	2340.66	2421.68	40.5239	2701.8	2691.36	2643.05	2678.74	18.0961	2439.56	2434.98	2446.96	2440.5	3.49012
	SRT	min,sec	10.55			10.55		11.43			11.43		11.39			11.39		11.53	-	-	11.53
17	HST	Kg	28	29.1	29.1	28.7333	0.366667	29.1	30.5	28.9	29.5	0.503322	29.3	26.8	27.8	27.9667	0.726483	28.8	28.6	29.6	29	0.305505
	CMJ	Newton	1497.71	1466.03	1342.12	1435.29	47.4725	1192.3	1134.01	1130.7	1152.34	20.0045	1554.23	1427.84	1324.64	1435.57	66.3895	1034.62	1096.89	1012.63	1048.05	25.2332
	SRT	min,sec	8.27			8.27		9.15			9.15		9.04			9.04		10.06	-	-	10.06
8	HST	Kg	23.6	26	26.6	25.4	0.916515	-	-	-			27	27.5	26.2	26.9	0.378594	26.5	26.4	27.5	26.8	0.351188
	CMJ	Newton	1375.2	1365.92	1386.39	1375.84	5.91652	-	-	-			1346.1	1259.68	1355.15	1320.31	30.429	1203.24	1122.9	1071.26	1132.46	38.3983
	SRT	min,sec	7.29			7.29		-	-	-			7.17			7.17		8.47	-	-	8.47
18	HST	Kg	39.4	36.3	33.9	36.5333	1.59199	40.3	39.9	37.9	39.3667	0.742369	37.5	36.7	39.7	37.9667	0.896908	-	-	-
	CMJ	Newton	1473.67	1497.29	1471.57	1480.84	8.24518	1407.74	1371.43	1366.42	1381.86	13.0173	1509.58	1564.84	1632.78	1569.07	35.6266	-	-	-
	SRT	min,sec	12.49			12.49		13.39			13.39		13.55			13.55		-	-	-
5	HST	Kg	30	29.4	29.1	29.5	0.264575	-	-	-			31.7	31.1	32.3	31.7	0.34641	32.4	31.9	32.4	32.2333	0.166667
	CMJ	Newton	1290.47	1204.23	1224.58	1239.76	26.0286	-	-	-			1265.44	1227.93	1224.77	1239.38	13.0615	1117.25	1067.9	982.6	1055.92	39.3298
	SRT	min,sec	5.37			5.37		-	-	-			7.17			7.17		6.4	-	-	6.4
19	HST	Kg	51.3	51.1	57.9	53.4333	2.23408	-	-	-			60.1	57.3	54.1	57.1667	1.73333	62.2	60.9	62.5	61.8667	0.491031
	CMJ	Newton	2026.64	2008.94	1962.59	1999.39	19.0954	-	-	-			2073.64	2055.77	2041.69	2057.03	9.24569	1930.86	1916.69	1807.84	1885.13	38.8619
	SRT	min,sec	12.41			12.41		-	-	-			12.54			12.54		13.18	-	-	13.18
