# Supplementary figures and images for: Diurnal variations in the expression of core-clock genes correlate with resting muscle properties and predict fluctuations in exercise performance across the day
Source: PubMed Central journal article supplement — BMJ Open Sport Exerc Med. 2021 Feb 10;7(1):e000876. doi: 10.1136/bmjsem-2020-000876 (PMC7878143; doi:10.1136/bmjsem-2020-000876), 2021-02-10

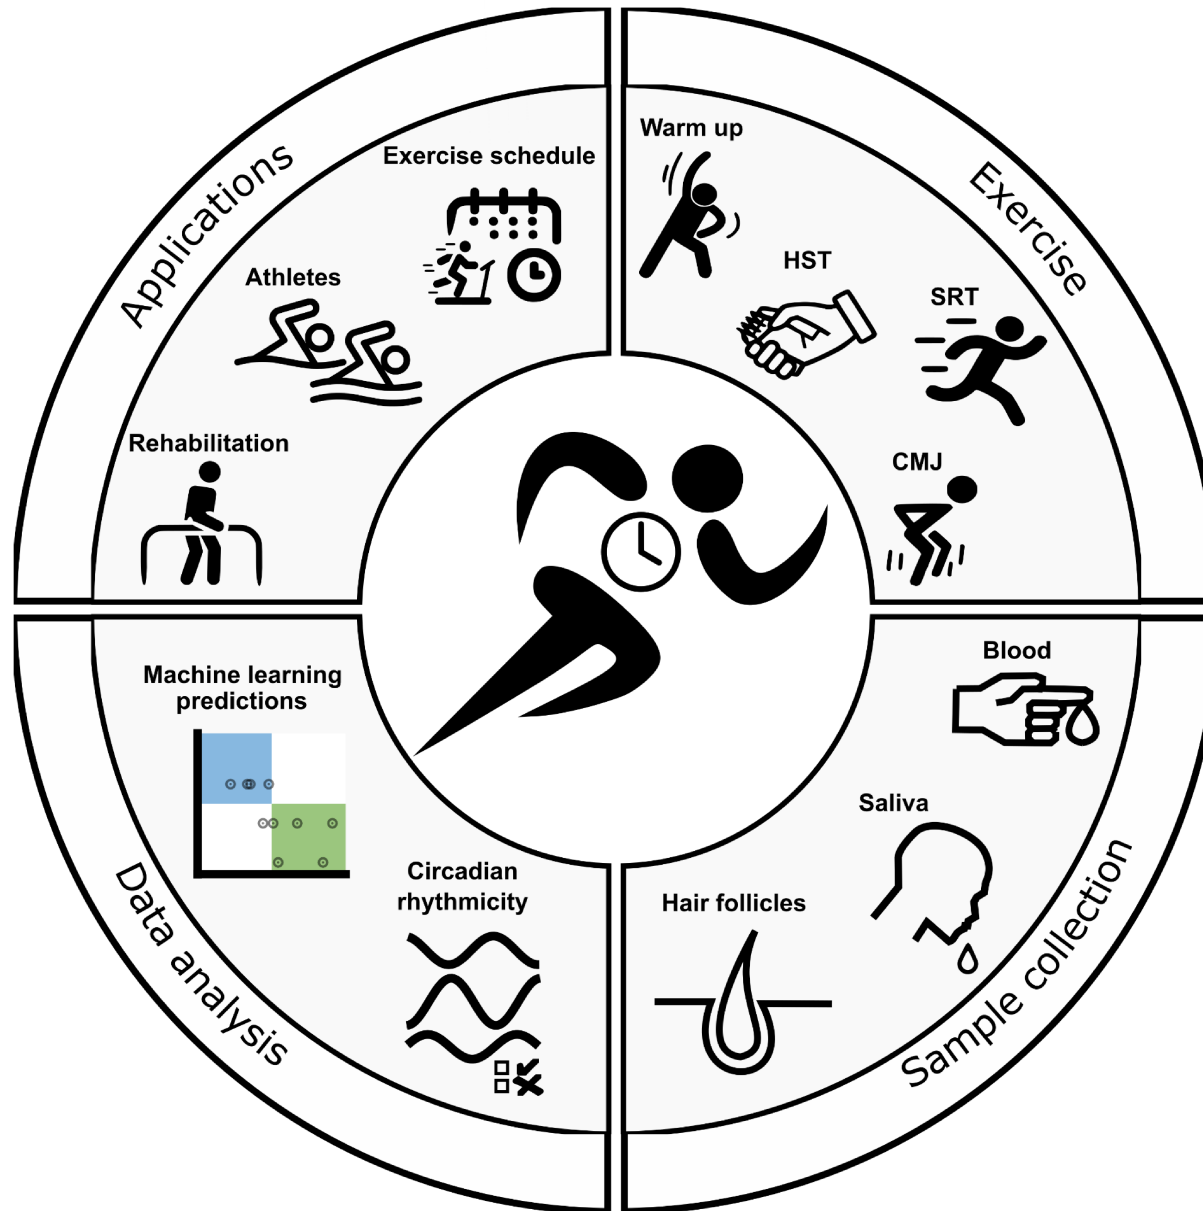

Supplement: bmjsem-2020-000876supp004.pdf [file bmjsem-2020-000876supp004.pdf]
